# Supplementary material for: A Comparative Proteomic Analysis of Pinellia ternata Leaves Exposed to Heat Stress
Source: Int J Mol Sci. 2013 Oct 15;14(10):20614–34. doi: 10.3390/ijms141020614 (PMC3821634; doi:10.3390/ijms141020614)
Supplement: Supplementary file 1 [file ijms-14-20614-s001.pdf]

# Supplementary Information

**Figure S1.** 2-DE gels of *P. ternata* leaves in control group (CK) and 24h heat treatment group (H24).

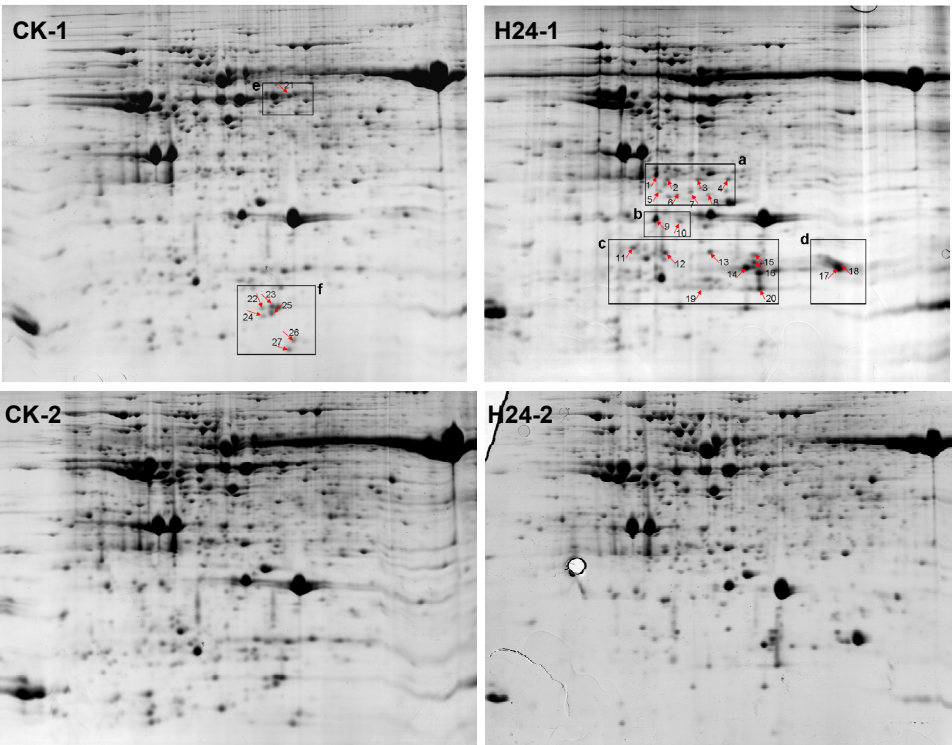

**Replicate 1**

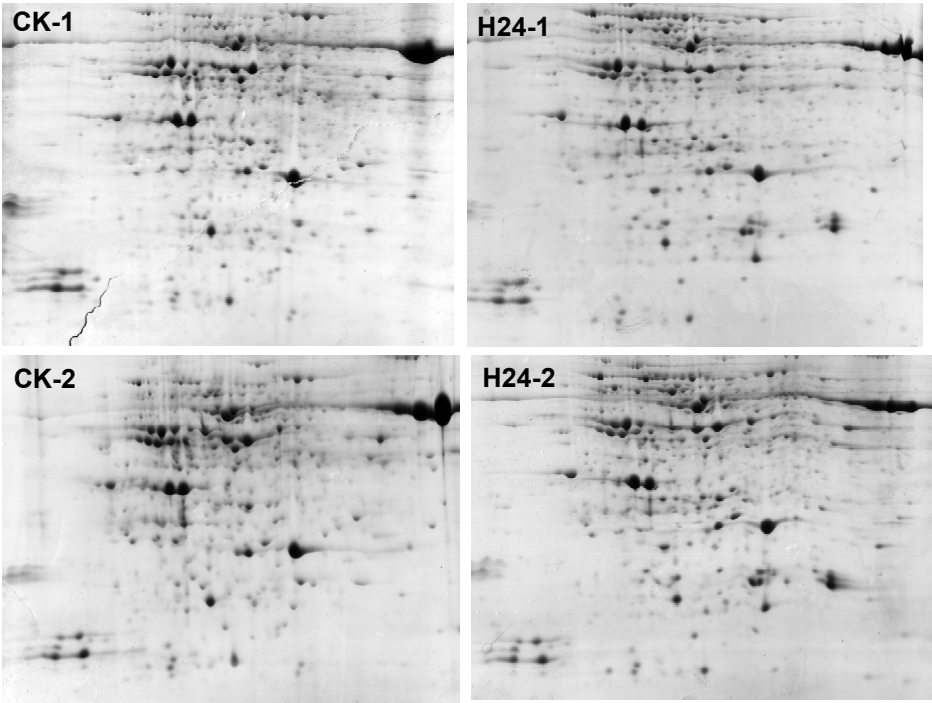

**Replicate 2**

**Figure S1. Cont.**

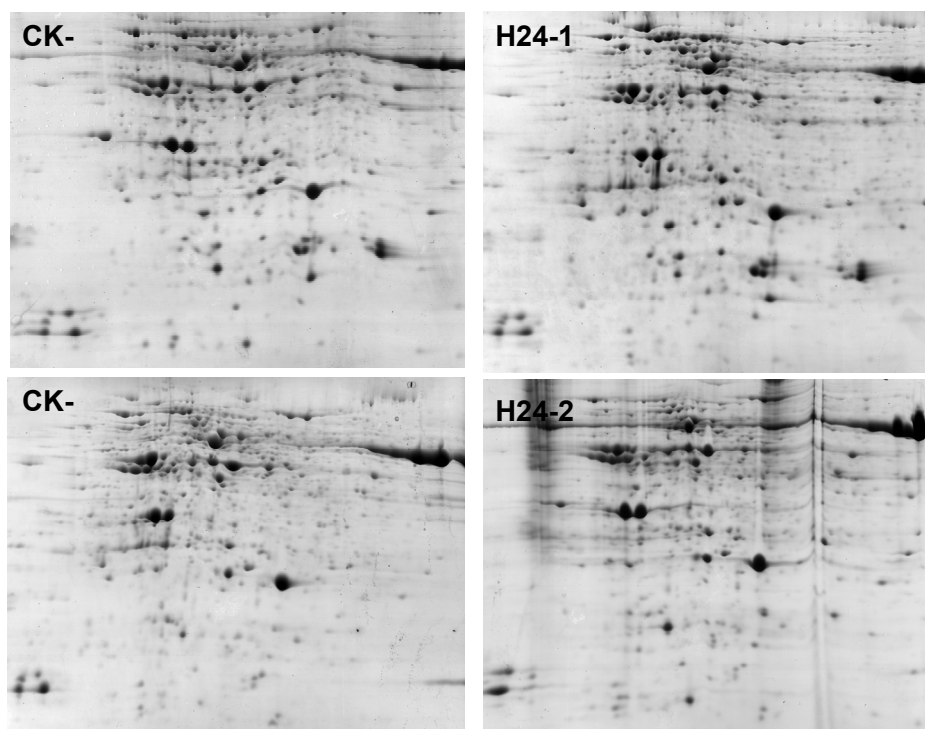

**Replicate 3**

© 2013 by the authors; licensee MDPI, Basel, Switzerland. This article is an open access article distributed under the terms and conditions of the Creative Commons Attribution license (<http://creativecommons.org/licenses/by/3.0/>).
